# Supplementary material for: Time Trends and Sociodemographic Factors Associated With Overweight and Obesity in Children and Adolescents in Spain
Source: PubMed Central journal article supplement (PMC7081120; doi:10.1001/jamanetworkopen.2020.1171), 2020-03-18
Supplement: jamanetwopen-3-e201171-s001.pdf [file jamanetwopen-3-e201171-s001.pdf]

## Supplementary Online Content

de Bont J, Díaz Y, Casas M, García-Gil M, Vrijheid M, Duarte-Salles T. Time trends and sociodemographic factors associated with overweight and obesity in children and adolescents in Spain. *JAMA Netw Open*. 2020;3(3):e201171.  
doi:10.1001/jamanetworkopen.2020.1171

**eTable 1.** Prevalence Trend of Overweight/Obesity and Obesity by Sex, Age Category, and Urban/Rural Residence, 2006-2016

**eTable 2.** Prevalence Trend of Overweight/Obesity and Obesity by Sex, Age Category, and Nationality, 2006-2016

**eTable 3.** Incidence rate (No. of New Cases per 100 Person-Years) of Overweight/Obesity and Obesity by Sex and Age, 2006-2016

**eTable 4.** Incidence Rate Ratios of Overweight/Obesity by Sex, Age, Deprivation Index, Urban/Rural Residence, Nationality, and Period, 2006-2016

**eTable 5.** Incidence Rate Ratios of Obesity by Sex, Age, Deprivation Index, Urban/Rural Residence, Nationality, and Period, 2006-2016

**eFigure 1.** Flow Chart of Studied Population

**eFigure 2.** Prevalence Trends of Overweight/Obesity and Obesity by Sex and Age Category, 2006-2016

**eFigure 3.** Percentage Change in the Prevalence of Overweight/Obesity and Obesity by Sex, Age Category, and Deprivation Index, 2006-2016

**eFigure 4.** Prevalence Trends of Overweight/Obesity and Sex, Age Category, and Nationality, 2006-2016

**eFigure 5.** Obesity Incidence by Sex According to Their zBMI Category Classification at Baseline, 2006-2016

This supplementary material has been provided by the authors to give readers additional information about their work.

**eTable 1.** Prevalence Trend of Overweight/Obesity and Obesity by Sex, Age Category, and Urban/Rural Residence, 2006-2016

|            |                              | Overweight/obesity                             |                                                |                                                 |                      | Obesity                                        |                                                |                                                 |                      |
|------------|------------------------------|------------------------------------------------|------------------------------------------------|-------------------------------------------------|----------------------|------------------------------------------------|------------------------------------------------|-------------------------------------------------|----------------------|
|            | Urban/<br>rural<br>residence | Prevalence ratio<br>2006 (95% CI) <sup>a</sup> | Prevalence ratio<br>2016 (95% CI) <sup>a</sup> | Change from<br>2006 to<br>2016 (%) <sup>b</sup> | p-trend <sup>c</sup> | Prevalence ratio<br>2006 (95% CI) <sup>a</sup> | Prevalence ratio<br>2016 (95% CI) <sup>a</sup> | Change from<br>2006 to<br>2016 (%) <sup>b</sup> | p-trend <sup>c</sup> |
| Boys, age  |                              |                                                |                                                |                                                 |                      |                                                |                                                |                                                 |                      |
| 2-5 y      | Rural                        | ref                                            | ref                                            | -26.27                                          | <0.01                | ref                                            | ref                                            | -28.95                                          | <0.01                |
|            | Urban                        | 1.16 (1.09-1.23)                               | 1.22 (1.14-1.32)                               | -21.96                                          | <0.01                | 1.21 (1.08-1.36)                               | 1.40 (1.21-1.61)                               | -18.03                                          | <0.01                |
| 6-11 y     | Rural                        | ref                                            | ref                                            | -8.54                                           | <0.01                | ref                                            | ref                                            | -7.28                                           | <0.01                |
|            | Urban                        | 1.09 (1.05-1.12)                               | 1.14 (1.10-1.17)                               | -4.52                                           | <0.01                | 1.17 (1.12-1.23)                               | 1.23 (1.18-1.28)                               | -2.76                                           | <0.01                |
| 12-17 y    | Rural                        | ref                                            | ref                                            | -9.07                                           | <0.01                | ref                                            | ref                                            | -8.39                                           | <0.01                |
|            | Urban                        | 1.10 (1.04-1.15)                               | 1.16 (1.11-1.21)                               | -3.86                                           | <0.01                | 1.15 (1.06-1.25)                               | 1.16 (1.09-1.24)                               | -7.51                                           | <0.01                |
| Girls, age |                              |                                                |                                                |                                                 |                      |                                                |                                                |                                                 |                      |
| 2-5 y      | Rural                        | ref                                            | ref                                            | -30.25                                          | <0.01                | ref                                            | ref                                            | -24.22                                          | <0.01                |
|            | Urban                        | 1.12 (1.05-1.19)                               | 1.25 (1.16-1.36)                               | -21.70                                          | <0.01                | 1.23 (1.08-1.40)                               | 1.29 (1.11-1.51)                               | -20.62                                          | <0.01                |
| 6-11 y     | Rural                        | ref                                            | ref                                            | -6.18                                           | <0.01                | ref                                            | ref                                            | -5.10                                           | <0.01                |
|            | Urban                        | 1.12 (1.08-1.16)                               | 1.12 (1.09-1.16)                               | -5.62                                           | <0.01                | 1.18 (1.11-1.25)                               | 1.19 (1.13-1.25)                               | -4.61                                           | 0.05                 |
| 12-17 y    | Rural                        | ref                                            | ref                                            | -3.49                                           | <0.01                | ref                                            | ref                                            | -7.60                                           | 0.11                 |
|            | Urban                        | 1.08 (1.02-1.14)                               | 1.11 (1.07-1.17)                               | -0.61                                           | <0.01                | 1.03 (0.94-1.14)                               | 1.14 (1.05-1.24)                               | 1.79                                            | <0.01                |

<sup>a</sup> Prevalence ratios were calculated using a Poisson regression with robust variance.

<sup>b</sup> Change from 2006 to 2016 (%): (prevalence 2016 – prevalence 2006) / prevalence 2006 \* 100.

<sup>c</sup> Logistic regression models were applied to test the p-trend using the study year as a continuous variable

**eTable 2.** Prevalence Trend of Overweight/Obesity and Obesity by Sex, Age Category, and Nationality, 2006-2016

|            |                              | Overweight/obesity                          |                                             |                                           |                      | Obesity                                     |                                             |                                           |                      |
|------------|------------------------------|---------------------------------------------|---------------------------------------------|-------------------------------------------|----------------------|---------------------------------------------|---------------------------------------------|-------------------------------------------|----------------------|
|            | Nationality                  | Prevalence ratio 2006 (95% CI) <sup>a</sup> | Prevalence ratio 2016 (95% CI) <sup>a</sup> | Change from 2006 to 2016 (%) <sup>b</sup> | p-trend <sup>c</sup> | Prevalence ratio 2006 (95% CI) <sup>a</sup> | Prevalence ratio 2016 (95% CI) <sup>a</sup> | Change from 2006 to 2016 (%) <sup>b</sup> | p-trend <sup>c</sup> |
| Boys, age  |                              |                                             |                                             |                                           |                      |                                             |                                             |                                           |                      |
| 2-5 y      | Spanish                      | ref                                         | ref                                         | -25.95                                    | <0.01                | ref                                         | ref                                         | -25.51                                    | <0.01                |
|            | African                      | 0.81 (0.69-0.96)                            | 1.17 (1.06-1.30)                            | 7.43                                      | 0.85                 | 0.60 (0.42-0.86)                            | 1.20 (1.01-1.44)                            | 49.31                                     | 0.02                 |
|            | North/Central/South American | 1.32 (1.08-1.61)                            | 2.03 (1.72-2.39)                            | 13.80                                     | 0.41                 | 1.18 (0.80-1.74)                            | 2.47 (1.87-3.25)                            | 55.71                                     | 0.28                 |
|            | Asian                        | 0.89 (0.64-1.23)                            | 1.39 (1.19-1.61)                            | 15.26                                     | 0.45                 | 0.89 (0.49-1.62)                            | 1.80 (1.41-2.30)                            | 50.28                                     | 0.78                 |
|            | European                     | 0.84 (0.68-1.03)                            | 1.07 (0.90-1.27)                            | -5.54                                     | 0.14                 | 0.70 (0.46-1.06)                            | 1.17 (0.86-1.57)                            | 24.54                                     | 0.72                 |
| 6-11 y     | Spanish                      | ref                                         | ref                                         | -6.05                                     | <0.01                | ref                                         | ref                                         | -4.46                                     | <0.01                |
|            | African                      | 0.48 (0.42-0.54)                            | 0.79 (0.75-0.84)                            | 55.22                                     | <0.01                | 0.37 (0.30-0.46)                            | 0.77 (0.71-0.83)                            | 97.39                                     | <0.01                |
|            | North/Central/South American | 1.20 (1.11-1.30)                            | 1.31 (1.21-1.41)                            | 1.94                                      | 0.73                 | 1.30 (1.16-1.45)                            | 1.44 (1.29-1.59)                            | 5.78                                      | 0.54                 |
|            | Asian                        | 0.62 (0.50-0.75)                            | 1.15 (1.07-1.23)                            | 75.47                                     | <0.01                | 0.78 (0.60-1.01)                            | 1.27 (1.15-1.39)                            | 55.40                                     | <0.01                |
|            | European                     | 0.79 (0.71-0.88)                            | 0.94 (0.88-1.01)                            | 12.06                                     | <0.01                | 0.70 (0.59-0.83)                            | 0.85 (0.76-0.95)                            | 16.51                                     | 0.02                 |
| 12-17 y    | Spanish                      | ref                                         | ref                                         | -5.29                                     | <0.01                | ref                                         | ref                                         | -8.41                                     | <0.01                |
|            | African                      | 0.45 (0.38-0.55)                            | 0.58 (0.52-0.64)                            | 20.32                                     | <0.01                | 0.38 (0.27-0.53)                            | 0.49 (0.41-0.60)                            | 18.91                                     | 0.03                 |
|            | North/Central/South American | 1.14 (1.02-1.28)                            | 1.17 (1.08-1.27)                            | -2.73                                     | 0.72                 | 1.20 (1.00-1.43)                            | 1.24 (1.09-1.42)                            | -4.96                                     | 0.13                 |
|            | Asian                        | 0.64 (0.50-0.82)                            | 0.99 (0.88-1.10)                            | 46.84                                     | <0.01                | 0.61 (0.40-0.91)                            | 1.07 (0.90-1.28)                            | 62.55                                     | <0.01                |
|            | European                     | 0.88 (0.75-1.03)                            | 1.02 (0.92-1.13)                            | 9.69                                      | 0.66                 | 0.86 (0.67-1.12)                            | 1.08 (0.91-1.27)                            | 14.06                                     | 0.92                 |
| Girls, age |                              |                                             |                                             |                                           |                      |                                             |                                             |                                           |                      |
| 2-5 y      | Spanish                      | ref                                         | ref                                         | -24.89                                    | <0.01                | ref                                         | ref                                         | -25.04                                    | <0.01                |
|            | African                      | 0.93 (0.79-1.09)                            | 1.16 (1.05-1.29)                            | -6.09                                     | 0.03                 | 1.01 (0.74-1.37)                            | 1.25 (1.03-1.52)                            | -7.22                                     | 0.49                 |
|            | North/Central/South American | 1.69 (1.40-2.04)                            | 1.84 (1.53-2.21)                            | -18.26                                    | <0.01                | 1.98 (1.40-2.79)                            | 2.53 (1.86-3.45)                            | -3.90                                     | 0.03                 |
|            | Asian                        | 0.79 (0.54-1.14)                            | 0.94 (0.78-1.14)                            | -10.29                                    | 0.13                 | 0.65 (0.29-1.45)                            | 1.18 (0.84-1.65)                            | 35.67                                     | 0.65                 |
|            | European                     | 0.86 (0.69-1.08)                            | 1.04 (0.86-1.25)                            | -9.59                                     | 0.74                 | 0.72 (0.44-1.15)                            | 1.38 (1.01-1.90)                            | 44.87                                     | 0.10                 |
| 6-11 y     | Spanish                      | ref                                         | ref                                         | -5.88                                     | <0.01                | ref                                         | ref                                         | -5.07                                     | <0.01                |
|            | African                      | 0.61 (0.54-0.69)                            | 0.87 (0.83-0.92)                            | 33.97                                     | <0.01                | 0.56 (0.46-0.69)                            | 0.85 (0.78-0.93)                            | 43.60                                     | <0.01                |
|            | North/Central/South American | 1.15 (1.06-1.25)                            | 1.26 (1.17-1.37)                            | 3.43                                      | 0.95                 | 1.22 (1.07-1.40)                            | 1.41 (1.25-1.60)                            | 9.69                                      | 0.29                 |
|            | Asian                        | 0.62 (0.50-0.79)                            | 0.87 (0.80-0.95)                            | 31.64                                     | <0.01                | 0.39 (0.24-0.62)                            | 0.80 (0.69-0.93)                            | 95.76                                     | <0.01                |
|            | European                     | 0.79 (0.70-0.90)                            | 0.90 (0.84-0.98)                            | 7.06                                      | <0.01                | 0.70 (0.56-0.86)                            | 0.92 (0.81-1.04)                            | 24.43                                     | <0.01                |
| 12-17 y    | Spanish                      | ref                                         | ref                                         | -2.42                                     | <0.01                | ref                                         | ref                                         | -2.31                                     | <0.01                |
|            | African                      | 0.85 (0.73-0.99)                            | 1.05 (0.96-1.16)                            | 20.50                                     | 0.05                 | 0.66 (0.48-0.90)                            | 1.15 (0.97-1.35)                            | 70.78                                     | 0.02                 |
|            | North/Central/South American | 1.26 (1.12-1.41)                            | 1.37 (1.26-1.49)                            | 6.25                                      | <0.01                | 1.29 (1.05-1.58)                            | 1.44 (1.25-1.67)                            | 9.37                                      | 0.02                 |
|            | Asian                        | 0.63 (0.46-0.87)                            | 0.99 (0.86-1.13)                            | 51.95                                     | <0.01                | 0.49 (0.25-0.94)                            | 1.13 (0.90-1.43)                            | 125.76                                    | <0.01                |
|            | European                     | 0.99 (0.84-1.17)                            | 0.99 (0.89-1.11)                            | -2.37                                     | 0.36                 | 1.21 (0.92-1.58)                            | 1.08 (0.88-1.31)                            | -12.94                                    | 0.42                 |

<sup>a</sup> Prevalence ratios were calculated using a Poisson regression with robust variance.

<sup>b</sup> Change from 2006 to 2016 (%): (prevalence 2016 – prevalence 2006) / prevalence 2006 \* 100.

<sup>c</sup> Logistic regression models were applied to test the p-trend using the study year as a continuous variable

**eTable 3.** Incidence rate (No. of New Cases per 100 Person-Years) of Overweight/Obesity and Obesity by Sex and Age, 2006-2016

|            |         | Incidence overweight/obesity |                                            | Incidence obesity |                                                         |
|------------|---------|------------------------------|--------------------------------------------|-------------------|---------------------------------------------------------|
|            |         | Cases                        | N° new cases / 100 person-year<br>(95% CI) | Cases             | Incidence<br>N° new cases / 100 person-year<br>(95% CI) |
| Boys, age  |         |                              |                                            |                   |                                                         |
|            | 2-3 y   | 6356                         | 1.78 (1.74-1.83)                           | 2043              | 0.54 (0.52-0.57)                                        |
|            | 4-5 y   | 19442                        | 4.49 (4.42-4.55)                           | 8463              | 1.78 (1.74-1.81)                                        |
|            | 6-7 y   | 40030                        | 11.87 (11.75-11.99)                        | 20800             | 4.86 (4.80-4.93)                                        |
|            | 8-9 y   | 20699                        | 7.86 (7.75-7.97)                           | 14073             | 3.88 (3.82-3.95)                                        |
|            | 10-11 y | 10465                        | 4.91 (4.81-5.00)                           | 5913              | 1.89 (1.84-1.94)                                        |
|            | 12-13 y | 5480                         | 3.10 (3.02-3.19)                           | 2717              | 1.00 (0.97-1.04)                                        |
|            | 14-15 y | 2193                         | 1.58 (1.51-1.64)                           | 1083              | 0.50 (0.47-0.53)                                        |
|            | 16-17 y | 543                          | 0.55 (0.50-0.60)                           | 424               | 0.28 (0.25-0.31)                                        |
| Girls, age |         |                              |                                            |                   |                                                         |
|            | 2-3 y   | 5584                         | 1.67 (1.62-1.71)                           | 1705              | 0.48 (0.46-0.50)                                        |
|            | 4-5 y   | 16131                        | 3.91 (3.85-3.97)                           | 6578              | 1.45 (1.42-1.49)                                        |
|            | 6-7 y   | 36729                        | 11.23 (11.11-11.34)                        | 15992             | 3.85 (3.79-3.91)                                        |
|            | 8-9 y   | 18953                        | 7.33 (7.23-7.44)                           | 9637              | 2.65 (2.60-2.71)                                        |
|            | 10-11 y | 7698                         | 3.54 (3.46-3.62)                           | 3612              | 1.12 (1.08-1.15)                                        |
|            | 12-13 y | 4464                         | 2.39 (2.32-2.46)                           | 2011              | 0.71 (0.68-0.74)                                        |
|            | 14-15 y | 2316                         | 1.52 (1.46-1.58)                           | 955               | 0.41 (0.38-0.44)                                        |
|            | 16-17 y | 968                          | 0.85 (0.80-0.91)                           | 554               | 0.32 (0.30-0.35)                                        |

**eTable 4.** Incidence Rate Ratios of Overweight/Obesity by Sex, Age, Deprivation Index, Urban/Rural Residence, Nationality, and Period, 2006-2016

| Overweight/obesity    |                                   |  | Incidence Rate Ratio (CI 95%) for each age categories |                  |                  |                  |                  |                  |                  |                  |     |     |
|-----------------------|-----------------------------------|--|-------------------------------------------------------|------------------|------------------|------------------|------------------|------------------|------------------|------------------|-----|-----|
|                       |                                   |  | 2-3 y                                                 | 4-5 y            | 6-7 y            | 8-9 y            | 10-11 y          | 12-13 y          | 14-15 y          | 16-17 y          |     |     |
| <b>Boys</b>           |                                   |  |                                                       |                  |                  |                  |                  |                  |                  |                  |     |     |
| Deprivation index     | Least deprived                    |  | ref                                                   | ref              | ref              | ref              | ref              | ref              | ref              | ref              | ref | ref |
|                       | Most deprived                     |  | 1.35 (1.23-1.48)                                      | 1.18 (1.12-1.24) | 1.21 (1.17-1.26) | 1.21 (1.15-1.27) | 1.20 (1.11-1.28) | 1.09 (0.99-1.21) | 1.11 (0.95-1.30) | 0.77 (0.57-1.04) |     |     |
| Urban/rural residence | Rural                             |  | ref                                                   | ref              | ref              | ref              | ref              | ref              | ref              | ref              | ref | ref |
|                       | Urban                             |  | 1.07 (1.01-1.14)                                      | 1.10 (1.06-1.14) | 1.13 (1.10-1.15) | 1.14 (1.10-1.18) | 1.07 (1.02-1.12) | 1.08 (1.01-1.15) | 1.02 (0.92-1.14) | 0.93 (0.76-1.14) |     |     |
| Nationality           | Spanish                           |  | ref                                                   | ref              | ref              | ref              | ref              | ref              | ref              | ref              | ref | ref |
|                       | African                           |  | 0.88 (0.79-0.99)                                      | 0.86 (0.80-0.91) | 0.75 (0.72-0.79) | 0.57 (0.52-0.61) | 0.56 (0.50-0.63) | 0.70 (0.60-0.81) | 0.84 (0.68-1.05) | 0.69 (0.42-1.13) |     |     |
|                       | American                          |  | 1.98 (1.66-2.36)                                      | 1.45 (1.30-1.62) | 1.23 (1.14-1.33) | 1.17 (1.06-1.30) | 1.16 (1.01-1.32) | 1.17 (0.99-1.38) | 1.01 (0.78-1.31) | 1.60 (1.04-2.45) |     |     |
|                       | Asian                             |  | 1.02 (0.84-1.23)                                      | 1.06 (0.95-1.17) | 0.98 (0.91-1.05) | 1.15 (1.04-1.27) | 1.07 (0.92-1.24) | 1.04 (0.85-1.27) | 1.21 (0.91-1.61) | 1.68 (1.02-2.75) |     |     |
|                       | European                          |  | 0.88 (0.74-1.05)                                      | 0.79 (0.71-0.87) | 0.78 (0.73-0.84) | 0.81 (0.74-0.89) | 0.88 (0.77-0.99) | 1.07 (0.91-1.25) | 1.08 (0.84-1.40) | 2.26 (1.53-3.32) |     |     |
| Time periods          | Period 1: (01/01/2006-30/06/2011) |  | ref                                                   | ref              | ref              | ref              | ref              | ref              | ref              | ref              | ref | ref |
|                       | Period 2: (01/07/2011-31/12/2016) |  | 0.80 (0.78-0.82)                                      | 0.94 (0.92-0.96) | 0.95 (0.92-0.97) | 0.95 (0.91-0.99) | 1.05 (0.99-1.12) | 0.92 (0.85-1.01) | 1.33 (1.10-1.60) | 0.80 (0.78-0.82) |     |     |
| <b>Girls</b>          |                                   |  |                                                       |                  |                  |                  |                  |                  |                  |                  |     |     |
| Deprivation index     | Least deprived                    |  | ref                                                   | ref              | ref              | ref              | ref              | ref              | ref              | ref              | ref | ref |
|                       | Most deprived                     |  | 1.38 (1.25-1.53)                                      | 1.25 (1.18-1.33) | 1.25 (1.20-1.30) | 1.30 (1.23-1.37) | 1.35 (1.24-1.47) | 1.53 (1.37-1.71) | 1.68 (1.44-1.95) | 2.20 (1.75-2.78) |     |     |
| Urban/rural residence | Rural                             |  | ref                                                   | ref              | ref              | ref              | ref              | ref              | ref              | ref              | ref | ref |
|                       | Urban                             |  | 1.12 (1.05-1.20)                                      | 1.07 (1.03-1.11) | 1.12 (1.10-1.15) | 1.14 (1.10-1.18) | 1.08 (1.03-1.15) | 1.13 (1.05-1.21) | 1.03 (0.93-1.14) | 1.25 (1.06-1.48) |     |     |
| Nationality           | Spanish                           |  | ref                                                   | ref              | ref              | ref              | ref              | ref              | ref              | ref              | ref | ref |
|                       | African                           |  | 0.89 (0.79-0.99)                                      | 0.78 (0.73-0.84) | 0.81 (0.77-0.85) | 0.78 (0.72-0.84) | 0.94 (0.84-1.05) | 1.57 (1.38-1.77) | 2.13 (1.82-2.49) | 2.35 (1.84-3.00) |     |     |
|                       | American                          |  | 1.53 (1.24-1.89)                                      | 1.45 (1.29-1.63) | 1.24 (1.14-1.33) | 1.12 (1.01-1.24) | 1.28 (1.12-1.48) | 1.82 (1.58-2.10) | 1.87 (1.56-2.26) | 3.02 (2.41-3.79) |     |     |
|                       | Asian                             |  | 0.98 (0.79-1.22)                                      | 0.71 (0.61-0.81) | 0.73 (0.67-0.80) | 0.83 (0.73-0.94) | 1.20 (1.01-1.42) | 1.40 (1.13-1.73) | 1.53 (1.14-2.05) | 1.63 (1.02-2.59) |     |     |
|                       | European                          |  | 0.66 (0.54-0.82)                                      | 0.78 (0.70-0.87) | 0.71 (0.66-0.77) | 0.75 (0.68-0.83) | 1.03 (0.90-1.18) | 1.28 (1.08-1.51) | 1.46 (1.17-1.83) | 1.77 (1.27-2.46) |     |     |
| Time periods          | Period 1: (01/01/2006-30/06/2011) |  | ref                                                   | ref              | ref              | ref              | ref              | ref              | ref              | ref              | ref | ref |
|                       | Period 2: (01/07/2011-31/12/2016) |  | 0.79 (0.76-0.81)                                      | 0.94 (0.92-0.96) | 1.00 (0.97-1.03) | 1.00 (0.95-1.05) | 1.00 (0.93-1.07) | 0.94 (0.86-1.03) | 0.89 (0.78-1.02) | 0.79 (0.76-0.81) |     |     |

**eTable 5.** Incidence Rate Ratios of Obesity by Sex, Age, Deprivation Index, Urban/Rural Residence, Nationality, and Period, 2006-2016

| Obesity               |                                   |  | Incidence Rate Ratio (CI 95%) for each age categories |                  |                  |                  |                  |                  |                  |                  |
|-----------------------|-----------------------------------|--|-------------------------------------------------------|------------------|------------------|------------------|------------------|------------------|------------------|------------------|
|                       |                                   |  | 2-3 y                                                 | 4-5 y            | 6-7 y            | 8-9 y            | 10-11 y          | 12-13 y          | 14-15 y          | 16-17 y          |
| <b>Boys</b>           |                                   |  |                                                       |                  |                  |                  |                  |                  |                  |                  |
| Deprivation index     | Least deprived                    |  | ref                                                   | ref              | ref              | ref              | ref              | ref              | ref              | ref              |
|                       | Most deprived                     |  | 2.11 (1.77-2.51)                                      | 1.59 (1.46-1.72) | 1.54 (1.46-1.62) | 1.52 (1.42-1.62) | 1.51 (1.37-1.67) | 1.63 (1.41-1.88) | 1.64 (1.30-2.08) | 1.47 (1.03-2.09) |
| Urban/rural residence | Rural                             |  | ref                                                   | ref              | ref              | ref              | ref              | ref              | ref              | ref              |
|                       | Urban                             |  | 1.22 (1.09-1.36)                                      | 1.20 (1.14-1.27) | 1.20 (1.16-1.24) | 1.23 (1.18-1.28) | 1.14 (1.07-1.21) | 1.20 (1.09-1.32) | 1.22 (1.05-1.43) | 1.17 (0.91-1.50) |
| Nationality           | Spanish                           |  | ref                                                   | ref              | ref              | ref              | ref              | ref              | ref              | ref              |
|                       | African                           |  | 0.99 (0.82-1.19)                                      | 0.80 (0.72-0.88) | 0.75 (0.70-0.81) | 0.55 (0.49-0.61) | 0.57 (0.48-0.67) | 0.63 (0.49-0.81) | 0.69 (0.48-1.01) | 1.00 (0.59-1.71) |
|                       | American                          |  | 2.55 (1.93-3.36)                                      | 1.63 (1.39-1.91) | 1.27 (1.15-1.41) | 1.27 (1.13-1.43) | 1.35 (1.16-1.59) | 1.63 (1.34-1.98) | 1.61 (1.20-2.15) | 1.49 (0.90-2.45) |
|                       | Asian                             |  | 1.88 (1.45-2.43)                                      | 1.42 (1.24-1.63) | 1.12 (1.02-1.24) | 1.22 (1.08-1.38) | 1.13 (0.93-1.39) | 1.43 (1.10-1.86) | 1.21 (0.78-1.88) | 2.64 (1.60-4.34) |
|                       | European                          |  | 0.91 (0.67-1.24)                                      | 0.78 (0.66-0.91) | 0.83 (0.76-0.92) | 0.79 (0.70-0.89) | 0.93 (0.79-1.11) | 1.18 (0.94-1.48) | 1.03 (0.69-1.53) | 2.98 (1.99-4.47) |
| Time periods          | Period 1: (01/01/2006-30/06/2011) |  | ref                                                   | ref              | ref              | ref              | ref              | ref              | ref              | ref              |
|                       | Period 2: (01/07/2011-31/12/2016) |  | 0.86 (0.82-0.90)                                      | 0.92 (0.89-0.95) | 0.94 (0.91-0.98) | 0.99 (0.93-1.05) | 1.06 (0.97-1.16) | 1.03 (0.91-1.16) | 0.94 (0.77-1.15) | 0.86 (0.82-0.90) |
| <b>Girls</b>          |                                   |  |                                                       |                  |                  |                  |                  |                  |                  |                  |
| Deprivation index     | Least deprived                    |  | ref                                                   | ref              | ref              | ref              | ref              | ref              | ref              | ref              |
|                       | Most deprived                     |  | 1.90 (1.57-2.30)                                      | 1.65 (1.50-1.81) | 1.68 (1.58-1.79) | 1.88 (1.74-2.04) | 1.82 (1.60-2.07) | 1.92 (1.62-2.27) | 2.32 (1.80-2.99) | 3.79 (2.66-5.38) |
| Urban/rural residence | Rural                             |  | ref                                                   | ref              | ref              | ref              | ref              | ref              | ref              | ref              |
|                       | Urban                             |  | 1.22 (1.07-1.38)                                      | 1.14 (1.07-1.21) | 1.19 (1.14-1.23) | 1.10 (1.04-1.15) | 1.11 (1.02-1.20) | 1.25 (1.12-1.41) | 0.99 (0.85-1.16) | 1.19 (0.96-1.49) |
| Nationality           | Spanish                           |  | ref                                                   | ref              | ref              | ref              | ref              | ref              | ref              | ref              |
|                       | African                           |  | 0.96 (0.78-1.17)                                      | 0.71 (0.63-0.80) | 0.83 (0.77-0.89) | 0.77 (0.69-0.87) | 1.01 (0.85-1.20) | 1.65 (1.36-2.01) | 2.43 (1.90-3.10) | 2.36 (1.69-3.30) |
|                       | American                          |  | 2.11 (1.52-2.92)                                      | 1.78 (1.51-2.10) | 1.34 (1.19-1.49) | 1.28 (1.12-1.46) | 1.42 (1.17-1.71) | 2.33 (1.94-2.81) | 1.83 (1.38-2.42) | 2.69 (1.99-3.63) |
|                       | Asian                             |  | 0.75 (0.48-1.18)                                      | 0.81 (0.65-1.00) | 0.66 (0.56-0.77) | 0.71 (0.58-0.87) | 1.26 (0.97-1.64) | 2.07 (1.56-2.76) | 2.19 (1.45-3.31) | 2.48 (1.46-4.21) |
|                       | European                          |  | 1.10 (0.81-1.50)                                      | 0.81 (0.68-0.96) | 0.82 (0.73-0.91) | 0.67 (0.58-0.79) | 1.25 (1.03-1.52) | 1.30 (1.00-1.70) | 1.58 (1.11-2.24) | 1.07 (0.60-1.90) |
| Time periods          | Period 1: (01/01/2006-30/06/2011) |  | ref                                                   | ref              | ref              | ref              | ref              | ref              | ref              | ref              |
|                       | Period 2: (01/07/2011-31/12/2016) |  | 0.86 (0.81-0.90)                                      | 0.94 (0.91-0.97) | 0.97 (0.93-1.02) | 0.95 (0.88-1.02) | 1.08 (0.98-1.19) | 1.00 (0.88-1.15) | 0.95 (0.80-1.14) | 0.86 (0.81-0.90) |

**eFigure 1.** Flow Chart of Studied Population

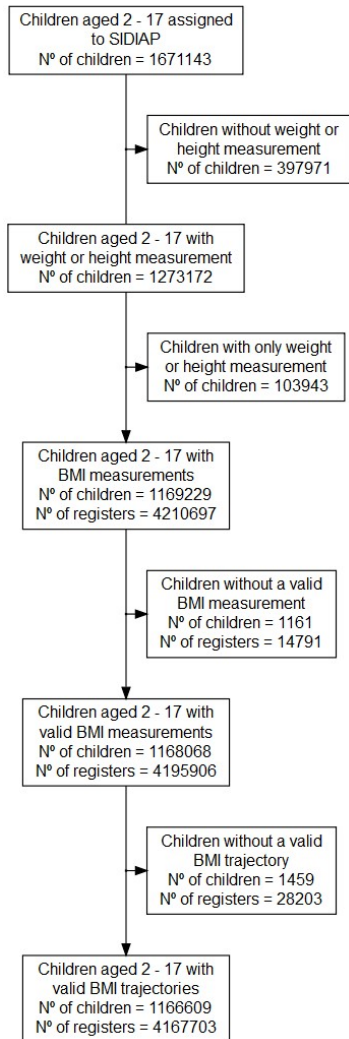

**eFigure 2.** Prevalence Trends of Overweight /Obesity and Obesity by Sex and Age Category, 2006-2016

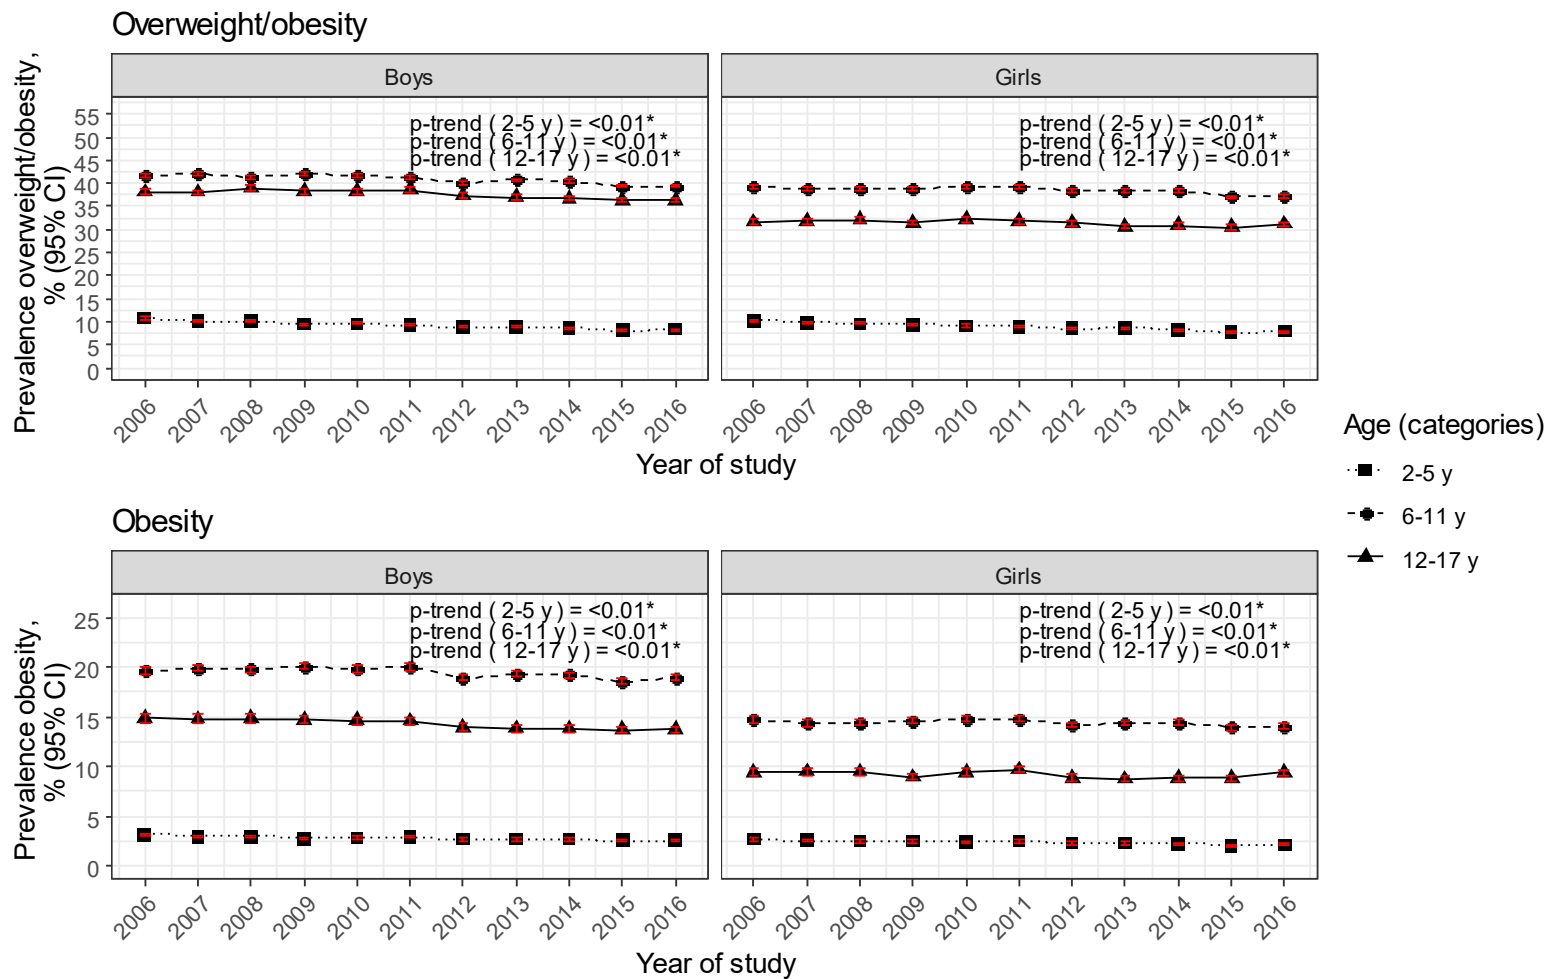

Prevalence trends over time were evaluated with a logistic regression models using the study year as a continuous variable (independent variable) and overweight and obesity as binary variables (dependent variables).



**eFigure 3.** Percentage Change in the Prevalence of Overweight/Obesity and Obesity by Sex, Age Category, and Deprivation Index, 2006-2016

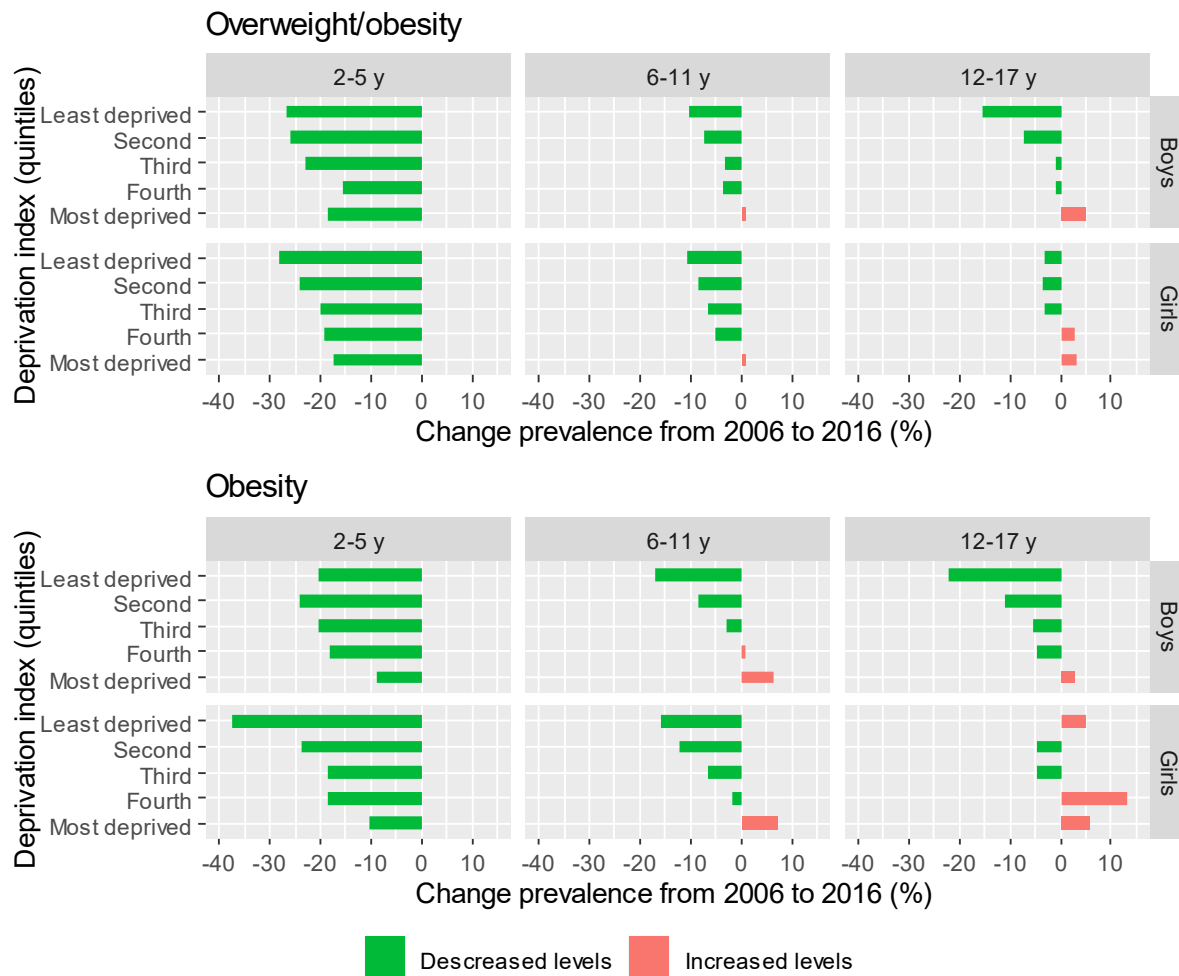

Change from 2006 to 2016 (%) by deprivation index:  $(\text{prevalence 2016} - \text{prevalence 2006}) / \text{prevalence 2006} * 100$ .

**eFigure 4.** Prevalence Trends of Overweight/Obesity and Sex, Age Category, and Nationality, 2006-2016

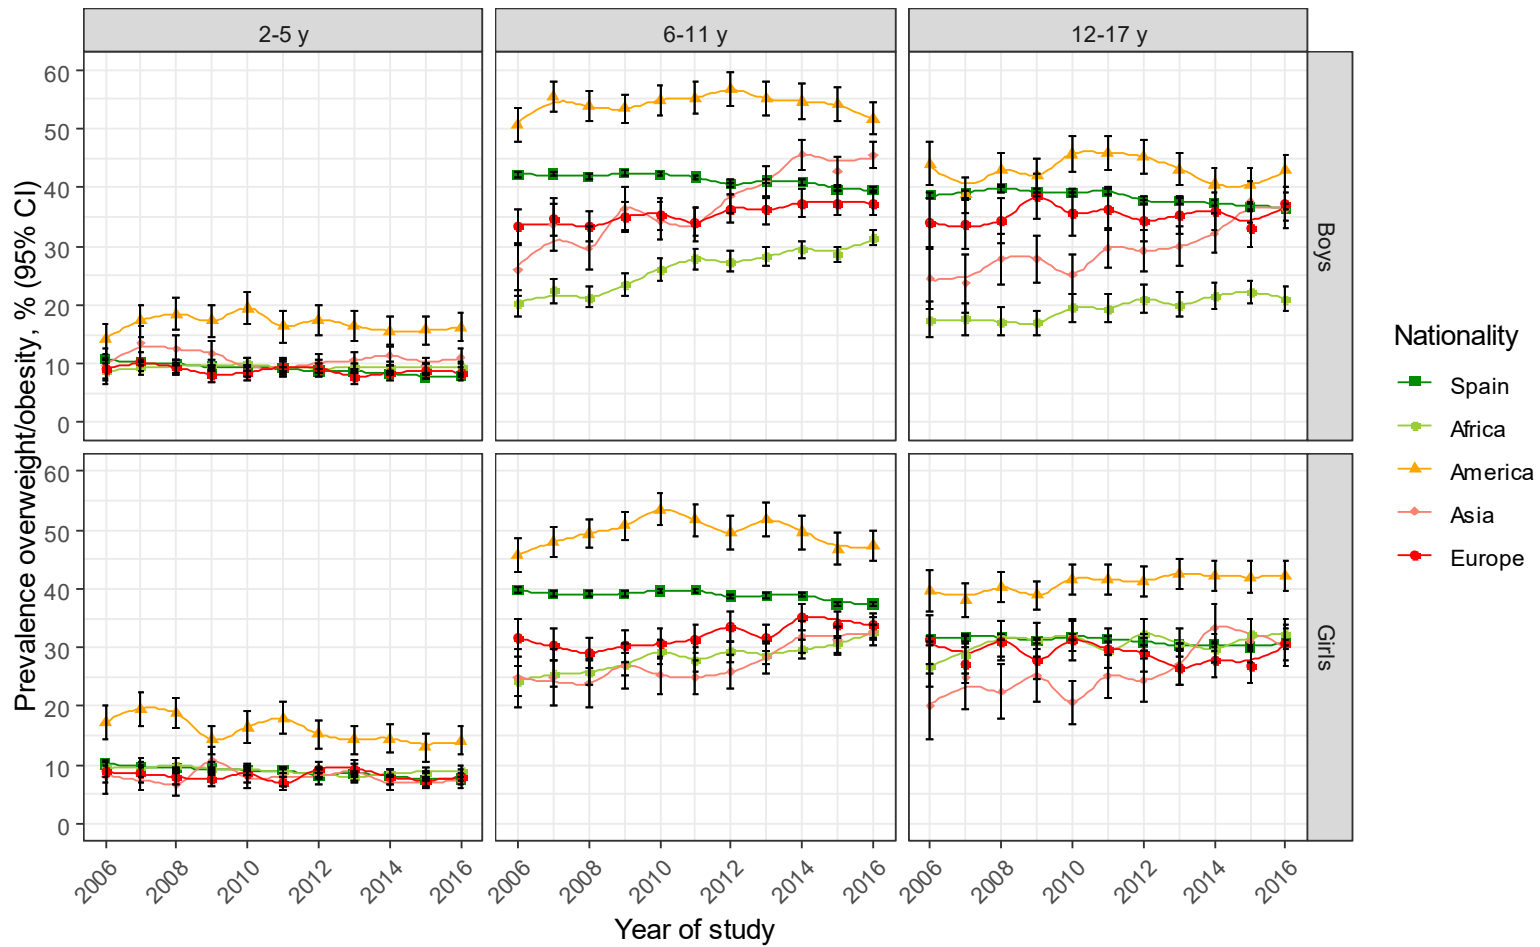

Note: prevalence trends of overweight/obesity with 95% CIs (black error bars) stratified by sex, age category and nationality

**eFigure 5.** Obesity Incidence by Sex According to Their zBMI Category Classification at Baseline, 2006-2016

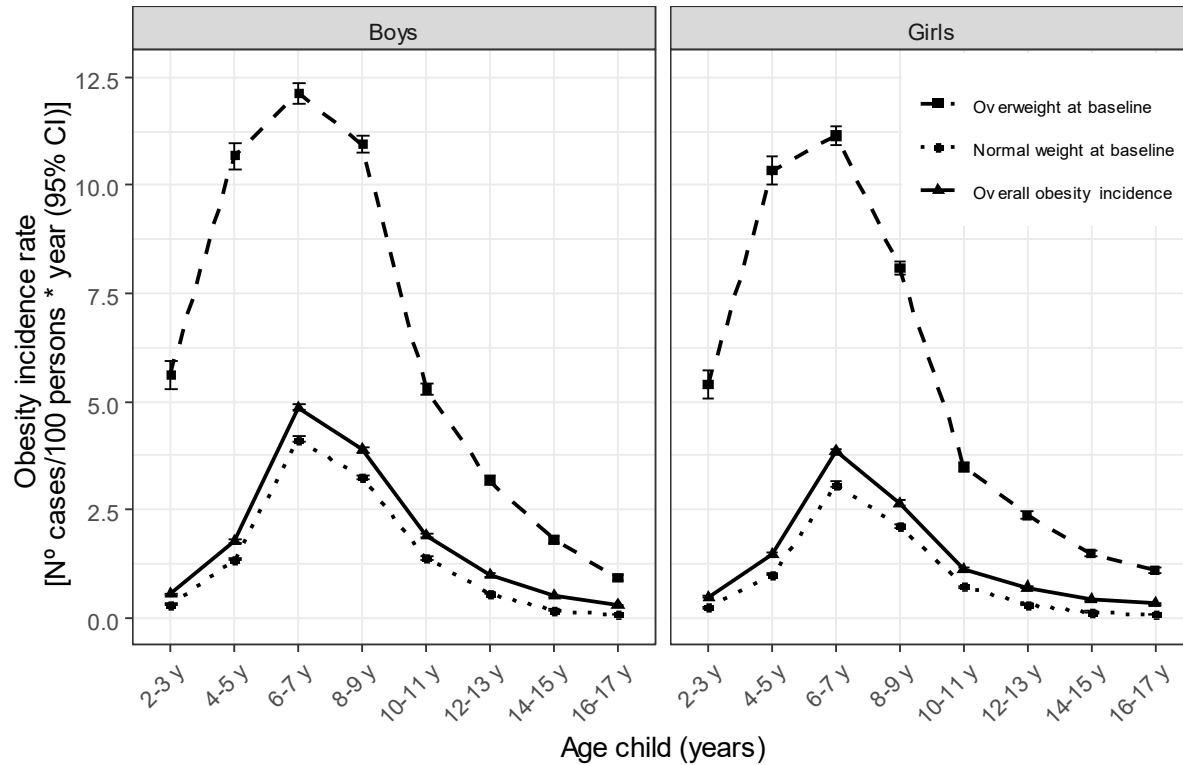

Overweight and normal weight at baseline was children who were overweight and normal weight at their first BMI measurement, respectively. Overall obesity incidence is the incidence of both children who were overweight or normal weight at baseline.
